# Supplementary material for: An analytical method to characterize the crystal structure of layered double hydroxides: synthesis, characterization, and electrochemical studies of zinc-based LDH nanoplates
Source: Royal Society of Chemistry journal article supplement (doi:10.1039/d0ta01774d), 2020-01-01
Supplement: d0ta01774d1.pdf [file d0ta01774d1.pdf]

## Supporting Information

### **An analytic method to characterize the crystal structure of layered double hydroxides : synthesis, characterization, and electrochemical studies of zinc-based LDH nanoplates**

**Authors:** Jiyong Chung,<sup>1</sup> Jaeyoung Lee,<sup>1</sup> Jae Kyeom Kim<sup>2</sup>, Minseong Kim,<sup>3</sup> Kug-Seung Lee,<sup>4†</sup> Seung-Joo Kim,<sup>3†</sup> Min Hyung Lee,<sup>2†</sup> and Taekyung Yu<sup>1†</sup>

**Affiliations:**

<sup>1</sup> Department of Chemical Engineering, Department of Chemical Engineering, Kyung Hee University, Yongin 17104, Korea

<sup>2</sup> Department of Applied Chemistry, Kyung Hee University, Yongin, Gyeonggi 17104, Korea

<sup>3</sup> Department of Energy Systems Research, Department of Chemistry, Ajou University, Suwon 16499, Korea

<sup>4</sup> Beamline Division, Pohang Accelerator Laboratory, Pohang, Gyeongbuk 37673, Korea

†To whom correspondence should be addressed. E-mail: [lks3006@postech.ac.kr](mailto:lks3006@postech.ac.kr), [sjookim@ajou.ac.kr](mailto:sjookim@ajou.ac.kr); [minhlee@khu.ac.kr](mailto:minhlee@khu.ac.kr); [tkyu@khu.ac.kr](mailto:tkyu@khu.ac.kr).

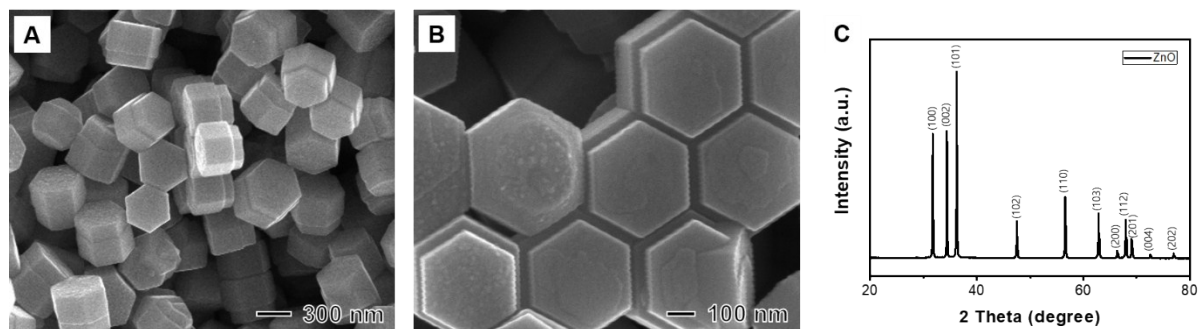

**Fig. S1.** SEM images and XRD patterns of ZnO nanobolts

(A) and (B) SEM images and (C) XRD patterns of ZnO nanobolts synthesized by heating an aqueous solution containing  $\text{Zn}(\text{NO}_3)_2 \cdot 6\text{H}_2\text{O}$  and octylamine at 60 °C for 1 h.

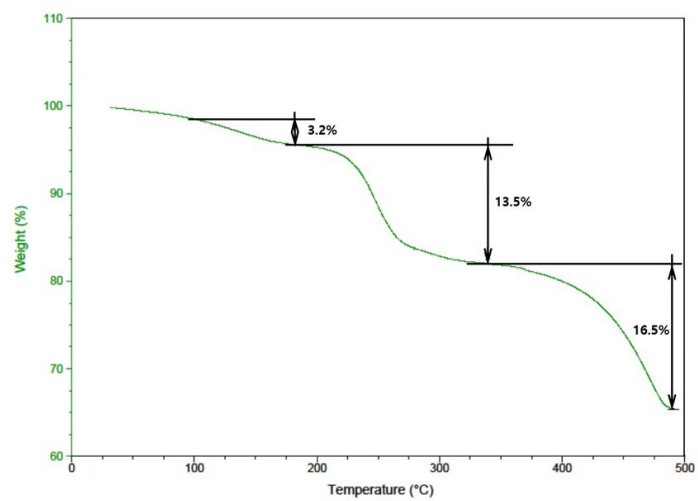

**Fig. S2.** Thermogravimetric data of  $\text{Zn}_{3.1}\text{Co}_{1.9}\text{Cl}_2(\text{OH})_8 \cdot \text{H}_2\text{O}$ .

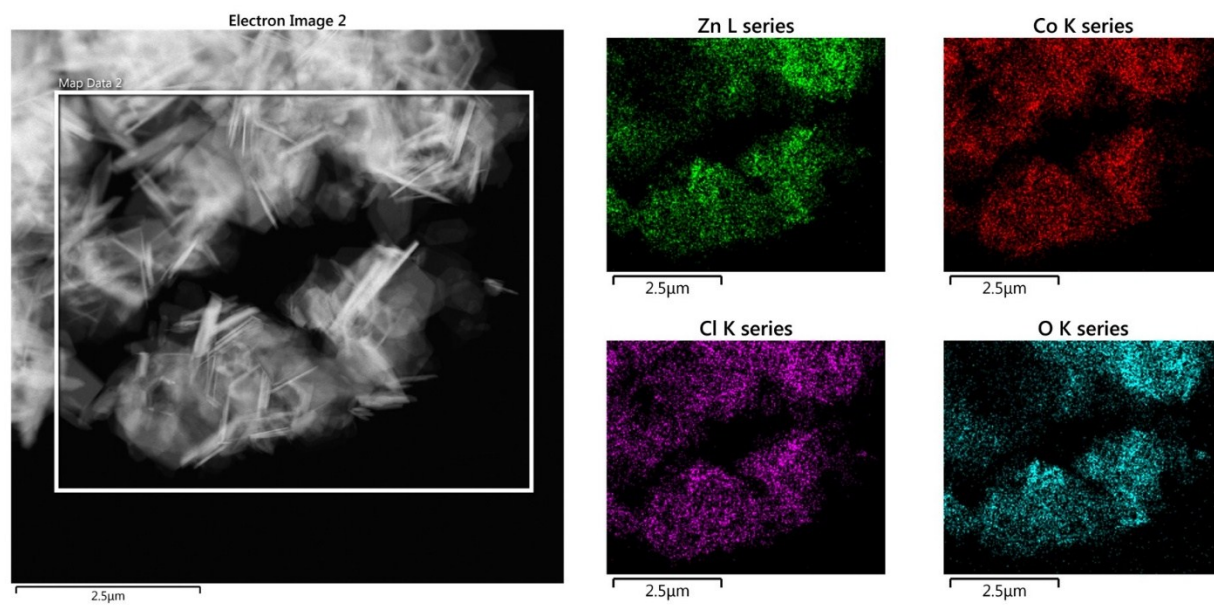

**Fig. S3.** Elemental mapping of synthesized ZnCo LDHs.

TEM image and elemental mapping of the sample prepared by heating an aqueous solution containing ZnO nanorods and Cobalt(II) chlorides at 90 °C for 2 h.

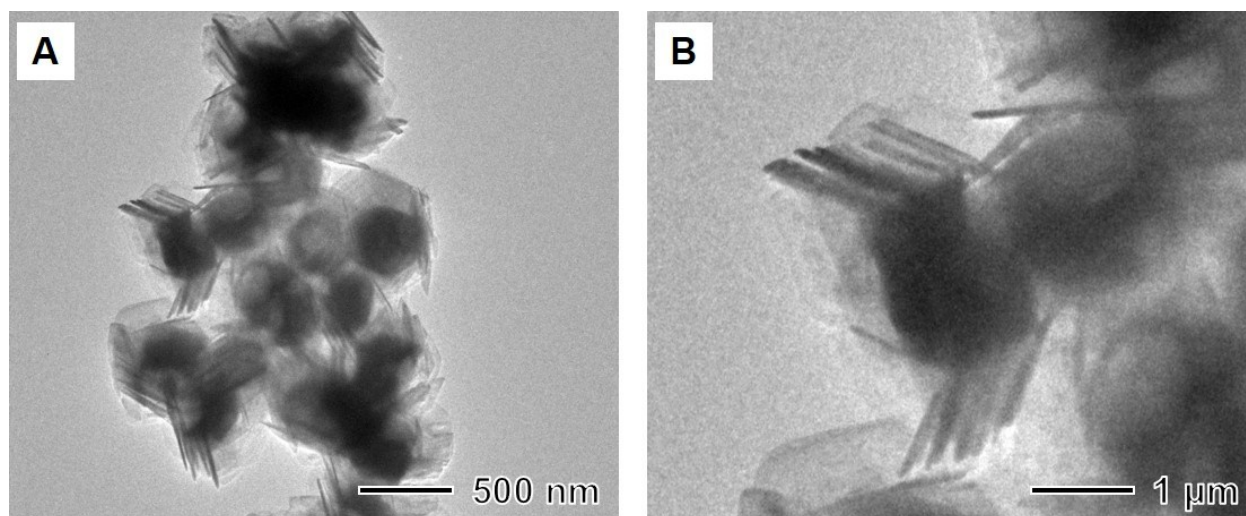

**Fig. S4.** TEM images of a sample taken at early stage.

(A) TEM image and (B) HR-TEM image of a sample taken at early stage.

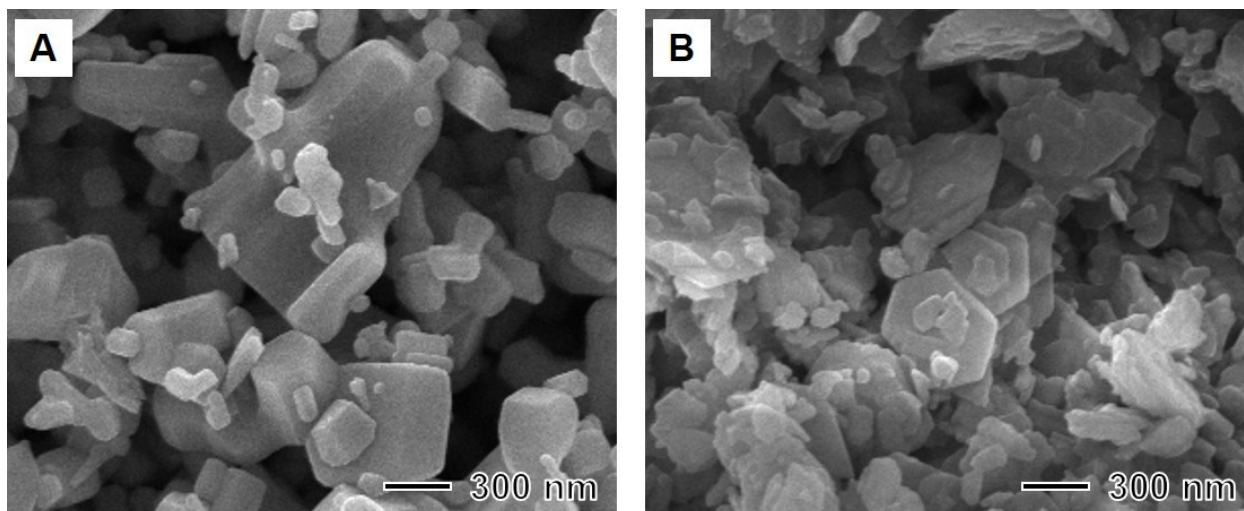

**Fig. S5.** SEM images of the commercial random-shaped ZnO particles and synthesized ZnCo LDHs from the commercial ZnO particles.

(A) SEM images of the commercial random-shaped ZnO particles, (B) SEM image of the sample prepared by heating an aqueous solution containing the commercial ZnO particles and cobalt(II) chloride at 90 °C for 2 h.

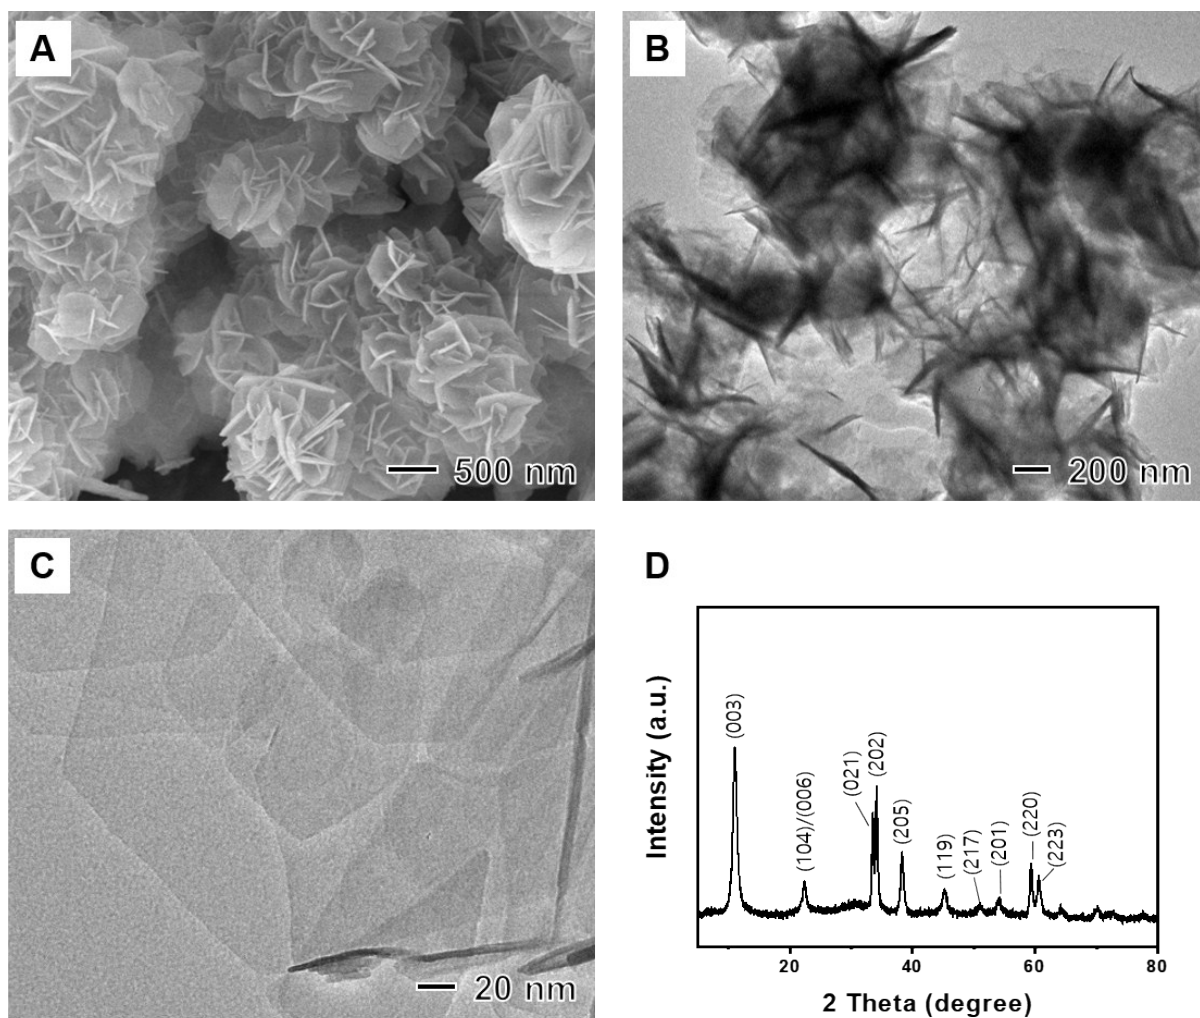

**Fig. S6.** Characterization of ZnNi LDHs synthesized by same process except transition metal precursor, which is heating an aqueous solution containing ZnO nanobolts and NiCl<sub>2</sub> at 90 °C for 2 h. (A) Typical SEM image, (B) TEM image, (C) HR-TEM image, (D) XRD patterns of ZnNi LDHs.

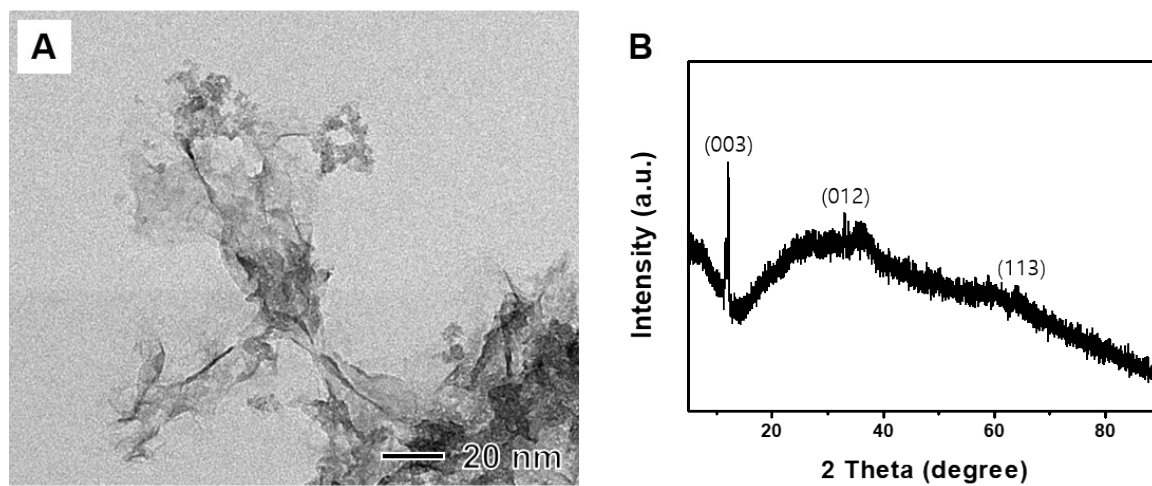

**Fig. S7.** Characterization of a sample that previously reported ZnCo LDHs. (A) TEM image and (B) XRD patterns of reported ZnCo LDHs.

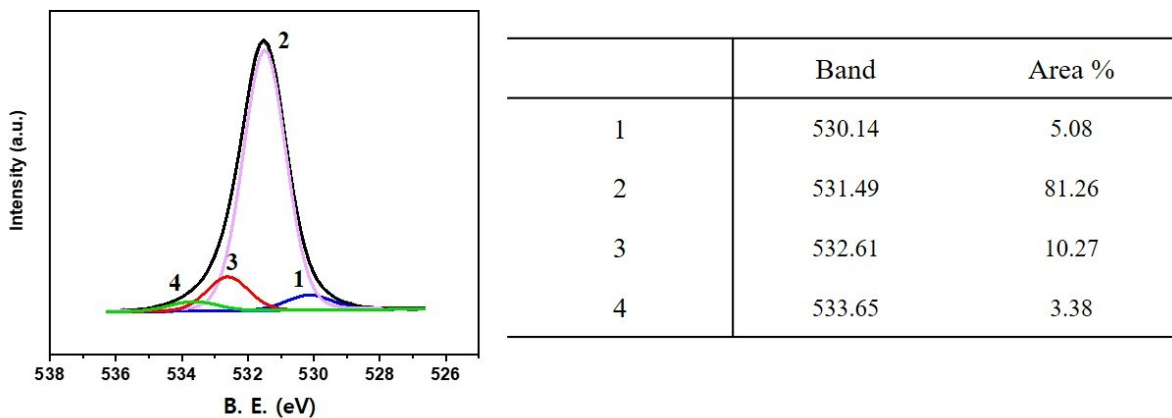

**Fig. S8. High-resolution O 1s spectra of the synthesized ZnCo LDHs.** The O 1s spectra of ZnCo LDHs include four peaks of 1(530.14 eV), 2(531.49 eV), 3(532.61 eV), 4(533.65 eV), in which 3(532.61) was attributed to oxygen vacancy.

**Table S1**

Inductively coupled plasma (ICP) result of synthesized ZnCo LDHs.

| Element | Weight (ppm) |
|---------|--------------|
| Zn      | 7.58         |
| Co      | 4.02         |

**Table S2**

Extracted parameters of each catalyst from EIS spectra in Fig. 5c.

| Parameter                                         | ZnCo Reported | ZnCo Synthesized | RuO <sub>2</sub> |
|---------------------------------------------------|---------------|------------------|------------------|
| $R_{sol} (\Omega)$                                | 9.89          | 8.36             | 8.87             |
| $R_{ct} (\Omega)$                                 | 17.34         | 3.46             | 25.48            |
| $R_{ads} (\Omega)$                                | 45.55         | 28.30            | 686.20           |
| $CPE_{dl-T} (\Omega^{-1} \cdot s^{CPE_{dl}-P})$   | 0.001061      | 0.004412         | 0.000750         |
| $CPE_{dl-P}$                                      | 0.50008       | 0.79624          | 0.82492          |
| $CPE_{ads-T} (\Omega^{-1} \cdot s^{CPE_{ads}-P})$ | 0.001207      | 0.010895         | 0.000431         |
| $CPE_{ads-P}$                                     | 0.73395       | 0.87402          | 0.87378          |
